# Supplementary material for: Additional sex combs interacts with enhancer of zeste and trithorax and modulates levels of trimethylation on histone H3K4 and H3K27 during transcription of hsp70
Source: PubMed Central journal article supplement (PMC5605996; doi:10.1186/s13072-017-0151-3), 2017-09-19
Supplement: 13072_2017_151_MOESM8_ESM.pdf [file 13072_2017_151_MOESM8_ESM.pdf]

# Figure S2

## A

|        |                                                                                                             |     |
|--------|-------------------------------------------------------------------------------------------------------------|-----|
| ETSI-1 | -----mktitpdttttssqg-qqllipqadqhhqpmllqqqsllaappptmimehv                                                    | 50  |
| ETSI-2 | mqqplpnvltmktlppsgvpttiagqrlqpkmtgkgrk-----atsnrlppgavnlers<br>***: *. . *. * : * : * . . : : : * * : : * : | 54  |
| ETSI-1 | nlvdddekdpaleqlevspstkht-----hslrrhlpriivkpipekk-----                                                       | 95  |
| ETSI-2 | y-----qicqaviqnsnrenlkaqlrppaailnqhqtptttapapinpvtlnvstv<br>: . : : * . : . : * : * * . * * :               | 106 |
| ETSI-1 | ---pmaps---eeaaavstapapptrlicsrriqqqqqvkaaaaaaaaaaaaaaaaaaaaa                                               | 148 |
| ETSI-2 | aatpmsnittatgsmavaaappqnvkqeellvs-----<br>** : . * : * * * : : : . :                                        | 142 |
| ETSI-1 | qaqatssypsaispgskagtsqastmrevlasipgfsvkprrr---snkklt-----                                                   | 197 |
| ETSI-2 | gavgagalpaglppn-vmgvgrpgvykviqprmsgfprkkyvqrkpspttlirhvfspgp<br>* . . : * : * * . . : : : * * * : * . *     | 201 |
| ETSI-1 | -----taaqi-----eqtkdgidletp-----dsilas-----tnlrallnk                                                        | 230 |
| ETSI-2 | ggatataqqlqmlqqhhqsttspvpvqnpqqpapeqlihngngqyvlvhranvgaadnq<br>* * * : . * . . : : * . : : : . : * : * * :  | 261 |
| ETSI-1 | -qtfsllpplyqynliqllpsvdreaseleqpssasggspseairlsasclnneffara                                                 | 289 |
| ETSI-2 | aprassappmhqnfvtvqn-----plhsin-g-----<br>* * * : * : : : * * . *                                            | 288 |
| ETSI-1 | clewrerlsegeftpenqlklkteaereknkldpwklkhfefwgeknsrgkdkklesd                                                  | 349 |
| ETSI-2 | -----ipmggrgrpasvdt-----<br>* : * . . . *                                                                   | 302 |
| ETSI-1 | cknqk                                                                                                       | 354 |
| ETSI-2 | -----                                                                                                       | 302 |

## B

|               |                                                                                                                             |     |
|---------------|-----------------------------------------------------------------------------------------------------------------------------|-----|
| AsxETSI-2     | -----mqqplpnvltmktlppsgvptti---aqrlqpkmtgkgrkatsnrlppgavn1                                                                  | 51  |
| ASXL1943_1307 | ltaeegldpldslltswtvpstrggsdsngsycqqvdielkin---gdsealsphgest<br>: : * . : : : * : * * : . * * * : . * : * * . .              | 56  |
| AsxETSI-2     | ersyqicqaviqnsnrenlkaqlrppaailnqhqtptttapapinpvtlnvst-----                                                                  | 105 |
| ASXL1943_1307 | dtasdfeghltedsseadtreaavtkgssvdkdekpnwnqsaplskvnqdmrlvtrtdg<br>: : : : : * : * : . * : : : : * . . * * . * . :              | 115 |
| AsxETSI-2     | -----vaatpmsnittatgsmaa                                                                                                     | 123 |
| ASXL1943_1307 | mvapqsvsvrvcavrqkipdslllasteyqpravclsmgssveatnplvmqllqgslpl<br>* * * : * * :                                                | 175 |
| AsxETSI-2     | avaaappqn--vlkqeellvsgavgagalpaglppnvmgvgrp-gvykviqpr-msgfpr                                                                | 179 |
| ASXL1943_1307 | ekvlppahddsmsespqvpltkdqshgslrmgs---lhglgknsqmvdgsspslralke<br>. * : : : . : : : . * : * * : * : * : * : . * : . .          | 232 |
| AsxETSI-2     | kkyvqrkpspttlirhvfspgggataaqqlqmlqqhhqsttspvpvqnpqqpapeqli                                                                  | 239 |
| ASXL1943_1307 | pllpdscetgtglarieatqapgapqknckavpsfd-----slhpvtnpitss-rkle<br>: : * * * : . * . . : : : : * * * * : . : *                   | 284 |
| AsxETSI-2     | hqngngqyvlv--hranvgaadnqaprassappmhqnfvtvqnpplh-singipmggr-                                                                 | 294 |
| ASXL1943_1307 | emdskeqfssfscedqkevrams-gdsnsnaapgkspgdlttsrtprfsspnvisfgpeq<br>. . : : * : . : : * * . * . : : * * : : * : * . * * * : * . | 343 |
| AsxETSI-2     | -grp---asvd-----                                                                                                            | 301 |
| ASXL1943_1307 | tgralgdqsnvtgqgkklfgs<br>** : . *                                                                                           | 364 |
