# Supplementary material for: Additional sex combs interacts with enhancer of zeste and trithorax and modulates levels of trimethylation on histone H3K4 and H3K27 during transcription of hsp70
Source: PubMed Central journal article supplement (PMC5605996; doi:10.1186/s13072-017-0151-3), 2017-09-19

**Figure S6** % of input

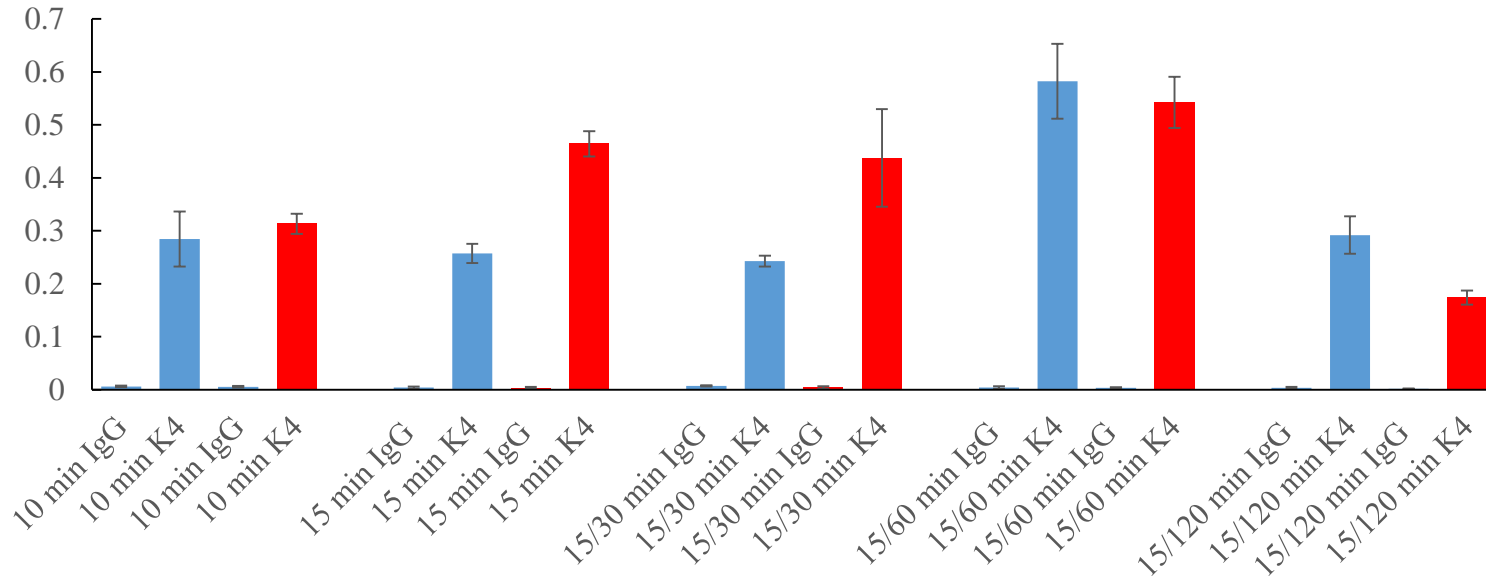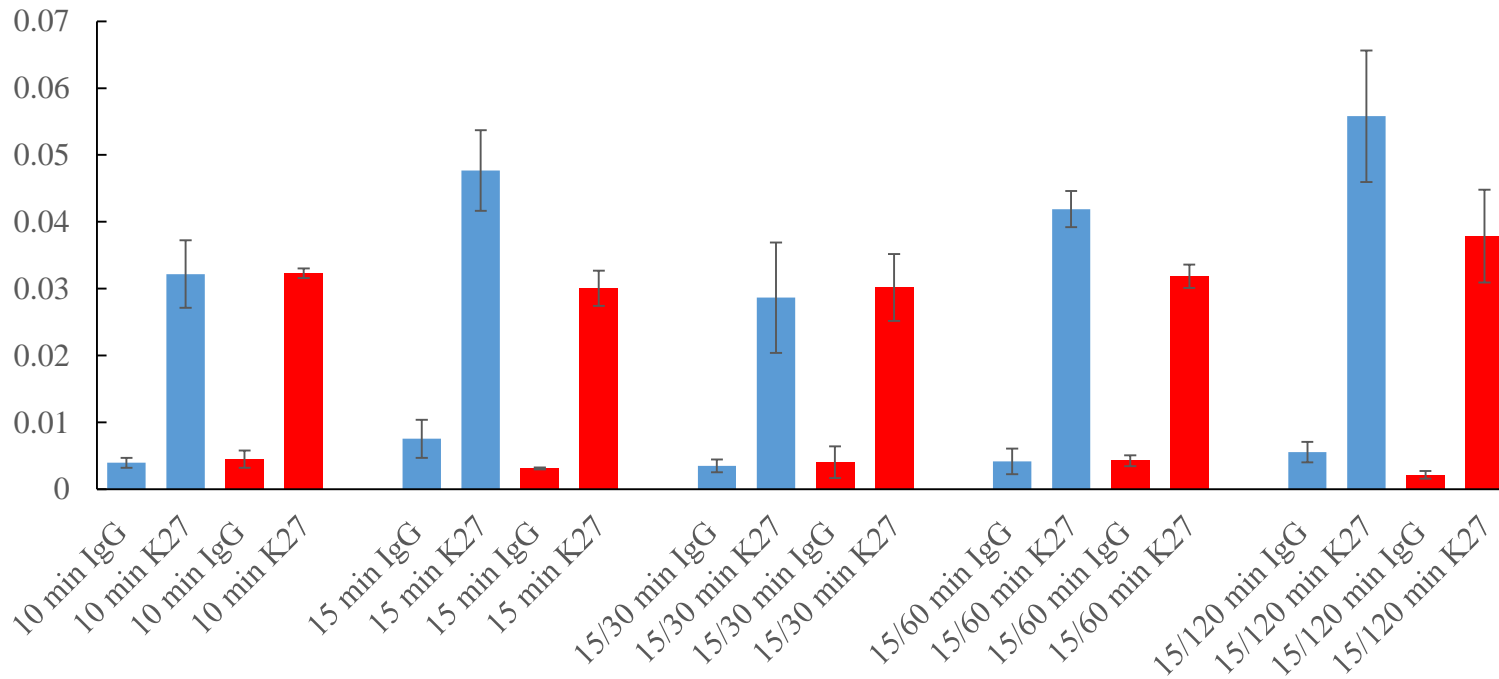

Supplement: 13072_2017_151_MOESM13_ESM.pdf [file 13072_2017_151_MOESM13_ESM.pdf]
